# Supplementary material for: Uses of medicinal plants by Haitian immigrants and their descendants in the Province of Camagüey, Cuba
Source: PubMed Central journal article supplement (PMC2690575; doi:10.1186/1746-4269-5-16), 2009-05-18
Supplement: 1746-4269-5-16-S1.pdf [file 1746-4269-5-16-S1.pdf]

| Additional file 1. Medicinal plants used by Haitian immigrants and their descendants in the Province of Camagüey, Cuba |                  |                             |                                        |                         |                                                      |                                                       |                                  |
|------------------------------------------------------------------------------------------------------------------------|------------------|-----------------------------|----------------------------------------|-------------------------|------------------------------------------------------|-------------------------------------------------------|----------------------------------|
| Botanical taxon (voucher specimen)                                                                                     | Botanical family | Cuban phytonym <sup>a</sup> | Haitian (Creole) phytonym <sup>a</sup> | Parts used <sup>b</sup> | Preparation <sup>c</sup> and way of use <sup>d</sup> | Medicinal use                                         | Quotation frequency <sup>e</sup> |
| <i>Abelmoschus esculentus</i> (L.) Moench                                                                              | Malvaceae        | quimbombó                   | kalalou                                | se                      | 7 or 21 seeds mac in rum, ing                        | aphrodisiac                                           | •                                |
|                                                                                                                        |                  |                             |                                        | fr                      | mac in rum, ing                                      | refreshing and diuretic                               | •                                |
| <i>Acalypha alopecurioides</i> Jacq. (8455)                                                                            | Euphorbiaceae    |                             | degonflé                               | le                      | dec or inf with salt, ing                            | <i>empacho</i> , stomach pains and digestive problems | ••                               |
|                                                                                                                        |                  |                             |                                        |                         | mix 18                                               | mix 18                                                |                                  |
| <i>Allium sativum</i> L.                                                                                               | Liliaceae        | ajo                         | lay                                    | bu                      | tr, ing                                              | intestinal parasites                                  | ••                               |
|                                                                                                                        |                  |                             |                                        |                         | mix 14                                               | mix 14                                                |                                  |
| <i>Allophylus cominia</i> (L.) Sw. (8603)                                                                              | Sapindaceae      | palo caja, palo monte       | twá padol                              | le                      | tr in water, bath                                    | to clean and refresh the skin                         | •                                |
|                                                                                                                        |                  |                             |                                        | st                      | dec or soaked in rum, ing                            | to take away the evil from the person                 | •                                |
| <i>Aloe vera</i> L. (8270)                                                                                             | Aloaceae         | sabila                      | lalwá                                  | le (inner part)         | ing                                                  | internal infections, hepatitis                        | •                                |
|                                                                                                                        |                  |                             |                                        |                         | vaginal suppository                                  | vaginal infections                                    | •                                |
| <i>Aloysia triphylla</i> (L'Her) Britton (8267)                                                                        | Verbenaceae      | yerba luisa                 |                                        | le                      | dec, ing                                             | diarrhea                                              | •                                |
| <i>Alpinia speciosa</i> Schum (8600)                                                                                   | Zingiberaceae    | colonia                     | fey canel                              | le                      | dec, bath                                            | to clean the skin, ritual bath                        | •                                |
|                                                                                                                        |                  |                             |                                        | ro                      | dec, ing                                             | catarrh, fever                                        | •                                |
| <i>Amaranthus</i> spp. (5198)                                                                                          | Amaranthaceae    | bledo                       | zepiná                                 | le                      | boiled and eaten as vegetables                       | intestinal parasites                                  | ••                               |
| <i>Ambrosia peruviana</i> Willd. (8468)                                                                                | Asteraceae       | artemisa                    |                                        | le                      | dec, ing                                             | intestinal parasites                                  | •                                |
| <i>Anacardium occidentale</i> L.                                                                                       | Anacardiaceae    | marañon                     | pòm                                    | le                      | dec, ing                                             | cough, <i>empacho</i>                                 | •                                |
|                                                                                                                        |                  |                             |                                        | ba                      | dec, ing                                             | menstrual disorders                                   | •                                |

|                                                       |              |                 |                |                |                                                                                       |                                                                             |    |
|-------------------------------------------------------|--------------|-----------------|----------------|----------------|---------------------------------------------------------------------------------------|-----------------------------------------------------------------------------|----|
| <i>Annona cherimolia</i> Mill. (7702)                 | Annonaceae   | chirimoya       |                | le             | dec, ing                                                                              | <i>empacho</i>                                                              | •  |
| <i>Annona muricata</i> L. (8259)                      | Annonaceae   | guanabana       | kogosol        | le             | inf, ing                                                                              | stenghten the children, for stomach problems of children, catarrh, sedative | •  |
|                                                       |              |                 |                |                | dec with leaves that already fell from the tree, ing                                  | high pressure                                                               | •  |
| <i>Annona squamosa</i> L. (8261)                      | Annonaceae   | anón            |                | le             | dec, ing                                                                              | <i>empacho</i>                                                              | •  |
|                                                       |              |                 |                |                | mix 16                                                                                | mix 16                                                                      |    |
|                                                       |              |                 |                | ro             | mix 17                                                                                | mix 17                                                                      |    |
| <i>Artemisia absinthium</i> L. (8617)                 | Asteraceae   | inciense ajenjo | tifey, lapsént | ap             | dec or mac in rum, ing                                                                | aphrodisiac, it gives strenght to men, intestinal parasites, stomachic      | •• |
|                                                       |              |                 |                |                | dec, bath                                                                             | to clean people and houses for the end of year                              | •  |
| <i>Bidens pilosa</i> L. (8404)                        | Asteraceae   | romerillo       |                | le             | inf, gargles                                                                          | throat ache                                                                 | •• |
|                                                       |              |                 |                |                | inf, ing                                                                              | fever, catarrh, stomach ulcera                                              | •• |
|                                                       |              |                 |                |                | mix 1                                                                                 | mix 1                                                                       |    |
|                                                       |              |                 |                |                | mix 4                                                                                 | mix 4                                                                       |    |
| <i>Bixa orellana</i> L. (8279)                        | Bixaceae     | bija            | woukou         | se             | smashed and heated with oil, applied as a plature                                     | burns                                                                       | •  |
| <i>Boldoa purpuracens</i> Cav. (8395)                 | Bignoniaceae | nitro           |                | le             | dec, ing                                                                              | diuretic                                                                    | •  |
| <i>Brachiaria purpurascens</i> (Raddi) Henrard (8280) | Poaceae      | paraná          |                | ro             | dec, ing                                                                              | intestinal parasites                                                        | •  |
|                                                       |              |                 |                |                | mix 19                                                                                | mix 19                                                                      |    |
| <i>Bromelia pinguin</i> L.                            | Bromeliaceae | piña raton      | pengwé         | fr, inner part | ing at fast in the morning after leaving the fruit some days outside without the peel | intestinal parasites                                                        | •  |

|                                                 |                  |                       |             |          |                                                                         |                                                      |    |
|-------------------------------------------------|------------------|-----------------------|-------------|----------|-------------------------------------------------------------------------|------------------------------------------------------|----|
| <i>Bursera simaruba</i> L. (8295)               | Burseraceae      | almacigo              | gomyé       | le       | picked up and put under the pillow                                      | colds, influenza                                     | •  |
|                                                 |                  |                       |             |          | dec, bath                                                               | measle                                               | •• |
|                                                 |                  |                       |             | sh       | mix 17                                                                  | mix 17                                               |    |
| <i>Caesalpinia bahamensis</i> Lam. (8292)       | Fabaceae         | brasilete             |             | ba       | mac in rum, ing                                                         | diuretic                                             | •  |
| <i>Cajanus cajan</i> (L.) Millsp. (8615)        | Fabaceae         | frijol gandul, gandul | pwa congó   | ap       | dec, two or three times per day                                         | intestinal parasites                                 | •  |
|                                                 |                  |                       |             |          | mix 19                                                                  | mix 19                                               |    |
|                                                 |                  |                       |             | sh       | three shoots, dec with salt                                             | <i>empacho</i>                                       | •  |
| <i>Canavalia ensiformis</i> (L.) DC. (7864)     | Fabaceae         | mate                  | pwa maldjók | se       | as collar for children                                                  | It protects against the evil eye and helps dentition | •  |
| <i>Canella winterana</i> (L.) Gaertn            | Canellaceae      | canela                | canel       | ba       | dec or mac in rum, ing                                                  | stomach pains, colds                                 | •• |
|                                                 |                  |                       |             |          | mix 14                                                                  | mix 14                                               |    |
| <i>Capraria biflora</i> L. (8458)               | Scrophulariaceae | magüiro               |             | sh       | dec, ing                                                                | colds, inflammations, ovaries pains                  | •  |
|                                                 |                  |                       |             |          | mix 20                                                                  | mix 20                                               |    |
| <i>Carica papaya</i> L. (2704)                  | Caricaceae       | papaya, fruta bomba   | papay       | young fr | peeled and grated, juice is filtered and drunk for three days with salt | intestinal parasites                                 | •• |
|                                                 |                  |                       |             | ro       | mac in water, drunk as common water                                     | high pressure                                        | •  |
|                                                 |                  |                       |             | se       | eaten along with the fruit                                              | to clean kidneys and ovaries                         | •  |
| <i>Cassia fistula</i> L.                        | Fabaceae         | caña fistula          | (kas dou)   | se       | tr, dec with sugar, ing                                                 | anemia                                               | •  |
| <i>Cecropia schrebiana</i> Miq. (8297)          | Cecropiaceae     | yagruma               | trorpèt     | yl       | dec, ing                                                                | asthma, catarrh, cough                               | •• |
|                                                 |                  |                       |             |          | mix 12                                                                  | mix 12                                               |    |
| <i>Chamissoa altissima</i> (Jacq.) Kunth (8123) | Amaranthaceae    |                       | lyann panye | le       | mac in rum or dec, ing                                                  | aperitive                                            | •  |

|                                                                  |                |                              |                        |             |                                                                                                      |                               |     |
|------------------------------------------------------------------|----------------|------------------------------|------------------------|-------------|------------------------------------------------------------------------------------------------------|-------------------------------|-----|
| <i>Chenopodium ambrosioides</i> L. (8256)                        | Chenopodiaceae | apasote                      | simen<br>kontrá        | le          | jex, ing with milk in the morning; dec, ing; tr with coconut milk, ing                               | intestinal parasites          | ••• |
|                                                                  |                |                              |                        | sh          | roasted, powdered, top                                                                               | eczema                        | •   |
| <i>Chiococca alba</i> L. (8236)                                  | Rubiaceae      | bejuco verraco, palo verraco | (kok souri)            | le          | dec in water or mac in rum                                                                           | aphrodisiac                   | •   |
|                                                                  |                |                              |                        | ro          | dec in water or mac in rum                                                                           | aphrodisiac                   | •   |
| <i>Chrysophyllum oliviforme</i> L. ssp. <i>oliviforme</i> (8143) | Sapotaceae     | caimitillo                   | ti kaymit              | le          | mix 7                                                                                                | mix 7                         |     |
| <i>Cissampelos pareira</i> L. (8248)                             | Menispermaceae |                              | pat chwal              | le          | dec of three halves of three leaves, ing                                                             | fever, stomach pains          | •   |
| <i>Cissus verticillata</i> L. (8244)                             | Vitaceae       | bejuco ubí                   | lyann motel, lyann mol | le          | dec with sugar, ing as syrup                                                                         | catarrh, respiratory problems | ••• |
|                                                                  |                |                              |                        | st, ap      | burnt, smoke inhalations                                                                             | asthma                        | •   |
|                                                                  |                |                              |                        | ap          | mix 1, 2, 3, 5                                                                                       | mix 1, 2, 3, 5                |     |
| <i>Citrus aurantiifolia</i> (Christm.) Swingle (8284)            | Rutaceae       | limon                        | sitron                 | le          | dec, bath                                                                                            | bath for children             | •   |
|                                                                  |                |                              |                        | fr ju       | mix 1                                                                                                | mix 1                         |     |
|                                                                  |                |                              |                        | sh          | mix 8                                                                                                | mix 8                         |     |
| <i>Citrus aurantium</i> L. (8272)                                | Rutaceae       | naranja agria                | zoranj si, zoghet      | fr          | jex with salt and sugar, ing                                                                         | to clean ovaries              | •   |
|                                                                  |                |                              |                        | fr peel     | mix 10                                                                                               | mix 10                        |     |
| <i>Citrus limetta</i> Risso                                      | Rutaceae       | lima                         | vergamot               | fr peel     | inf, ing                                                                                             | high pressure                 | •   |
| <i>Citrus sinensis</i> (L.) Osbeck                               | Rutaceae       | naranja                      | zogai, zoranj          | fr peel     | dec, ing                                                                                             | high pressure, colds          | ••  |
|                                                                  |                |                              |                        | le          | dec, ing                                                                                             | high pressure, colds          | •   |
| <i>Cocos nucifera</i> L.                                         | Arecaceae      | coco                         | kok                    | young fruit | opened, part inside is grated, salt added, ing                                                       | to clean ovaries              | •   |
|                                                                  |                |                              |                        | fr          | inner mass is grated and filtered, ing of the resulting liquid for three days at fast in the morning | intestinal parasites          | ••• |

|                                                       |                 |                                      |           |        |                                                                                         |                                                                                    |     |
|-------------------------------------------------------|-----------------|--------------------------------------|-----------|--------|-----------------------------------------------------------------------------------------|------------------------------------------------------------------------------------|-----|
|                                                       |                 |                                      |           | ro     | mac in rum                                                                              | diuretic                                                                           | •   |
| <i>Commelina elegans</i> H.B.K. (8398)                | Commelinaceae   | canuto                               |           | le     | mix 7                                                                                   | mix 7                                                                              |     |
| <i>Corchorus siliquosus</i> L. (8399)                 | Tiliaceae       | malva dulce                          | valedú    | le     | dec, filtered, washes                                                                   | vaginal washes after delivery                                                      | •   |
| <i>Coriandrum sativum</i> L.                          | Apiaceae        | cilantro                             | koulant   | le     | dec or inf, ing                                                                         | fever, vomiting                                                                    | •   |
| <i>Costus speciosus</i> Smuts (8257)                  | Costaceae       | caña mexicana                        |           | le     | dec, ing                                                                                | fever                                                                              | ••  |
| <i>Crescentia cujete</i> L. (8287)                    | Bignoniaceae    | güira                                | kalbaz    | fr     | cooked with sugar, honey, and rum ( <i>miel de güira</i> ), ing, mix 12, 13, 14, 15, 16 | catarrh, 'cold uterus', stomach problems, intestinal parasites, mix 12,13,14,15,16 | ••• |
| <i>Cucurbita maxima</i> Duch. (9820)                  | Cucurbitaceae   | calabaza                             | romú      | le     | dec, ing                                                                                | <i>empacho</i>                                                                     | •   |
|                                                       |                 |                                      |           |        | mix 6                                                                                   | mix 6                                                                              |     |
| <i>Cuminum cyminum</i> L.                             | Apiaceae        | comino                               |           | se     | mix 9                                                                                   | mix 9                                                                              |     |
| <i>Cymbopogon citratus</i> (DC.) Stapf. (8290)        | Poaceae         | calentura, cañasanta, yerba de limon | sitwonel  | le     | dec or inf, ing                                                                         | <i>frialdad</i> (colds), catarrh, stomach problems                                 | ••• |
|                                                       |                 |                                      |           |        | mix 10, 14                                                                              | mix 10, 14                                                                         |     |
| <i>Desmodium incanum</i> (Sw.) DC. (8431)             | Fabaceae        | amor seco, panadillo                 | wsé tuasú | ap     | dec, ing                                                                                | ovaries pains                                                                      | •   |
|                                                       |                 |                                      |           |        | mix 11                                                                                  | mix 11                                                                             |     |
| <i>Dichrostachys cinerea</i> (L.) Wight & Arn. (5816) | Fabaceae        | marabú                               |           | le     | three leaves, dec, ing                                                                  | diarrhea                                                                           | •   |
| <i>Erythroxylum havanense</i> Jacq. (8255)            | Erythroxylaceae | jibá                                 |           | le     | dec, ing                                                                                | catarrh, infections to kidneys                                                     | •   |
|                                                       |                 |                                      |           | ro     | mac in rum or dec, ing                                                                  | diuretic, respiratory and venereal infections, oedemas                             | ••  |
|                                                       |                 |                                      |           | mix 11 | mix 11                                                                                  |                                                                                    |     |
| <i>Eucalytus</i> sp.                                  | Myrtaceae       | eucalpto                             |           | le     | dec, ing                                                                                | catarrh                                                                            | •   |
| <i>Eupatorium odoratum</i> L. (8620)                  | Asteraceae      | rompezaragüey                        | lang chat | sh     | dec of three shoots with salt, ing; mix 1                                               | catarrh, cough, fever; mix 1                                                       | •   |

|                                                        |                |                        |             |        |                                                                                                 |                                                                                                                                           |    |
|--------------------------------------------------------|----------------|------------------------|-------------|--------|-------------------------------------------------------------------------------------------------|-------------------------------------------------------------------------------------------------------------------------------------------|----|
|                                                        |                |                        |             | le     | dec, bath                                                                                       | bath for children (for end of the year, with a stem of <i>Artemisia absinthium</i> ) and for measles; to clean from bad spirits the house | •• |
|                                                        |                |                        |             |        | crushed and mixed with honey, ing                                                               | asthma                                                                                                                                    | •  |
| <i>Gliricidia sepium</i> (Jacq.) Kunth ex Walp. (8403) | Fabaceae       | piñon                  | meznié      | le     | dec, ing                                                                                        | catarrh                                                                                                                                   | •  |
|                                                        |                |                        |             | sh     | mix 8                                                                                           | mix 8                                                                                                                                     |    |
| <i>Gossypium barbadense</i> L. (8425)                  | Malvaceae      | algodón                | koton       | sh     | dec, ing                                                                                        | galactogen, catarrh, cough                                                                                                                | •  |
|                                                        |                |                        |             | st     | heated at one extreme, collect with a feather the foam at the other extreme and apply topically | to eliminate scars left from burns                                                                                                        | •  |
| <i>Gouania polygama</i> (Jacq.) Urb. (8197)            | Rhamnaceae     | bejuco de indio        | lyann savón | st     | tr, water is poured on it, and foam is applied topically                                        | burns                                                                                                                                     | •  |
| <i>Guarea guidonia</i> (L.) Sleumer (8278)             | Meliaceae      | yamagua                | majó        | fl     | dec, ing                                                                                        | catarrh, colds                                                                                                                            | •  |
| <i>Guazuma ulmifolia</i> Lam. (6277)                   | Sterculiaceae  | guasima, guasima macho | bwa dóm     | sh, se | three shoots and five seeds, or three seeds, dec with salt, ing                                 | <i>empacho</i>                                                                                                                            | •  |
|                                                        |                |                        |             | le     | dec, ing                                                                                        | catarrh                                                                                                                                   | •• |
| <i>Hamelia patens</i> Jacq. (8274)                     | Rubiaceae      | ponasí                 | fey koray   | le     | dec, left to cool, baths for children                                                           | to clean the skin, for skin eruptions and measles                                                                                         | •  |
| <i>Hibiscus elatus</i> Sw. (8277)                      | Malvaceae      | majagua                |             | fl     | mix 12                                                                                          | mix 12                                                                                                                                    |    |
| <i>Illicium verum</i> Hook. F.                         | Illiciaceae    | aníz estrellado        | aní etoilé  | fr     | mac in rum or dec, ing                                                                          | stomachic                                                                                                                                 | •  |
|                                                        |                |                        |             |        | mix 14                                                                                          | mix 14                                                                                                                                    |    |
| <i>Ipomoea batatas</i> (L.) Lam.                       | Convolvulaceae | boniato                | patát, duz  | sh     | dec, ing                                                                                        | galactogen                                                                                                                                | •• |

|                                               |               |                             |             |                                 |                                                |                                                                 |     |
|-----------------------------------------------|---------------|-----------------------------|-------------|---------------------------------|------------------------------------------------|-----------------------------------------------------------------|-----|
|                                               |               |                             | patát       |                                 |                                                |                                                                 |     |
| <i>Isocarpha atriplicifolia</i> R. Br. (9568) | Asteraceae    | manzanilla                  | manzaní     | ap                              | dec is filtered and applied topically in drops | eyes infections, conjuntivitis                                  | •   |
|                                               |               |                             |             |                                 | dec, bath                                      | skin eruptions                                                  | •   |
|                                               |               |                             |             |                                 | dec or inf with salt, ing; mix 18              | <i>empacho</i> , stomach problems; mix 18                       | ••  |
| <i>Jatropha gossypifolia</i> L.               | Euphorbiaceae | tuatua, tubatuba            | timapú      | le                              | dec, ing as common water                       | colds, inflammations                                            | •   |
|                                               |               |                             |             | ro                              | mix 11, 21                                     | mix 11, 21                                                      |     |
| <i>Jatropha urens</i> L. (8265)               | Euphorbiaceae | kiaya, chaya                |             | sh                              | dec, three shoots for three times per day, ing | intestinal parasites                                            | •   |
| <i>Justicia pectoralis</i> Jacq. (8607)       | Acanthaceae   | tilo                        | sèpantye    | ap                              | mix 22                                         | mix 22                                                          |     |
| <i>Kalanchoe pinnata</i> (Lam.) Pers.         | Crassulaceae  | hoja de viento, prodigiosa  | (lou garou) | le                              | dec, ing                                       | fever                                                           | •   |
| <i>Lawsonia alba</i> L. (9567)                | Lythraceae    | resedá                      | (resedá)    | le                              | mix 22                                         | mix 22                                                          |     |
| <i>Lepidium virginicum</i> L. (7699)          | Brassicaceae  | mastuerzo                   | kreson      | le                              | dec, ing                                       | intestinal parasites, carminative, diuretic, menstruation pains | ••  |
|                                               |               |                             |             |                                 | heated and applied top on the stomach          | to expell gases, carminative                                    | •   |
| <i>Lippia alba</i> (Mill.) N.E. Br. (8239)    | Verbenaceae   | quitadolor, menta americana | fey melis   | ap                              | dec, ing                                       | catarrh, colds, stomach pains, menstrual pains                  | ••• |
| <i>Luffa aegyptiaca</i> Mill. (8633)          | Cucurbitaceae | estropago                   | fey kosción | fr                              | boiled, washes with the dec                    | scabies                                                         | •   |
| <i>Majorana hortensis</i> Moench (8433)       | Lamiaceae     | mejorana                    |             | ap                              | inf, ing                                       | stomach pains                                                   | •   |
|                                               |               |                             |             | le                              | mix 7                                          | mix 7                                                           |     |
| <i>Mangifera indica</i> L.                    | Anacardiaceae | mango                       | mangó       | le already fallen from the tree | dec or inf, ing                                | fever, catarrh, stomach problems                                | •   |
|                                               |               |                             |             | yl                              | dec of three yl, in three different cups, ing  | <i>empacho</i>                                                  | •   |

|                                                                                   |               |               |                |                   |                                                                          |                                                                         |     |
|-----------------------------------------------------------------------------------|---------------|---------------|----------------|-------------------|--------------------------------------------------------------------------|-------------------------------------------------------------------------|-----|
|                                                                                   |               |               |                | ba                | cut in pieces, dec, ing                                                  | gastritis, ulcera, refreshing and depurative                            | ••  |
| <i>Maranta arundinacea</i> L. (8222)                                              | Marantaceae   | yuquilla      |                | rh                | tr, top appl                                                             | fractures, bruises                                                      | •   |
| <i>Melia azederach</i> L.                                                         | Meliaceae     | paraís        | (paraís)       | le                | dec or mac in water, bath                                                | to clean (both ritually and skin cleaning), and take away bad influence | •   |
| <i>Melicoccus bijugatus</i> Jacq. (8258)                                          | Sapindaceae   | anoncillo     | kenép          | le                | dec, ing                                                                 | catarrh                                                                 | •   |
| <i>Mentha piperita</i> L. var. <i>citrata</i> (Ehrh.) Brig. (8613)                | Lamiaceae     | yerba buena   |                | le                | inf in water or mac in rum, ing                                          | stomachic, catarrh                                                      | •   |
| <i>Mirabilis jalapa</i> L. (8266)                                                 | Bignoniaceae  | maravilla     |                | fl                | rubbed top                                                               | pains                                                                   | •   |
| <i>Momordica charantia</i> L. (8432)                                              | Cucurbitaceae | cundeamor     | asorosí, yeské | le                | jex or dec, ing fasting in the morning (sometimes with sugar)            | intestinal parasites, blood cleansing, fever, stomach problems          | ••• |
|                                                                                   |               |               |                |                   | dec, or leaves put directly in the water of the bath, baths for children | refreshing, to clean the skin                                           | ••  |
|                                                                                   |               |               |                |                   | dec, add water, ing                                                      | drink for diabetic people                                               | •   |
|                                                                                   |               |               |                |                   | juice applied topically to the skin                                      | carbuncles, eruptions of measles and herpesvirus                        | •   |
| <i>Morinda royoc</i> L. (8235)                                                    | Rubiaceae     | palo garañon  |                | ro                | mac in rum, ing                                                          | diuretic, aphrodisiac                                                   | •   |
| <i>Mucuna pruriens</i> (Stickm.) DC. ssp. <i>deeringiana</i> (Bort) Hanelt (8471) | Fabaceae      | nescafé       | (pwa grate)    | se                | dec, also as coffee substitute, ing                                      | stomach problems                                                        | •   |
|                                                                                   |               |               |                | hair of the fruit | mixed with guava jam, ing                                                | intestinal parasites                                                    | •   |
| <i>Mucuna urens</i> (L.) DC. (8343)                                               | Fabaceae      | ojo de buey   |                | se                | kept in the pocket                                                       | against the evil eye                                                    | •   |
| <i>Musa x paradisiaca</i> L.                                                      | Musaceae      | platano macho | banán          | le                | dried, dec, ing                                                          | <i>empacho</i>                                                          | •   |
| <i>Myristica fragrans</i> Houtt.                                                  | Myristicaceae | nuez moscada  | mizká          | se                | dec or mac in rum, ing                                                   | stomach pains, carminative, colds                                       | ••  |
|                                                                                   |               |               |                |                   | mix 14                                                                   | mix 14                                                                  |     |



|                                                              |                |                                  |                      |                                 |                                                                                                                                                                                    |                                  |    |
|--------------------------------------------------------------|----------------|----------------------------------|----------------------|---------------------------------|------------------------------------------------------------------------------------------------------------------------------------------------------------------------------------|----------------------------------|----|
| <i>Ocimum basilicum</i> L. (8443)                            | Lamiaceae      | albahaca blanca                  | fey bazilik          | le                              | inf, ing                                                                                                                                                                           | colds, influenza                 | •• |
| <i>Ocimum gratissimum</i> L. (8445)                          | Lamiaceae      | albahaca cimarrona o mondonguera | (fonbazen)           | le                              | inf, ing                                                                                                                                                                           | catarrh                          | •  |
| <i>Opuntia ficus-indica</i> (L.) Mill.                       | Cactaceae      | tuna                             | rakèt                | le                              | a piece of the size of a foot is peeled and hanged above the fire, the liquid produced is thrown away, and leaf is then opened and applied topically in front and behind the liver | liver problems                   | •  |
| <i>Oxalis violacea</i> L. (8743)                             | Oxalidaceae    | trebol                           |                      | le                              | dec, mixed with animal fat, ing                                                                                                                                                    | asthma                           | •  |
| <i>Parthenium hysterophorus</i> L. (8255)                    | Asteraceae     | escoba amarga                    | (lapsént)            | ro                              | mix 20                                                                                                                                                                             | mix 20                           |    |
| <i>Pedilanthus tithymaloides</i> (L.) Poit. (8251)           | Euphorbiaceae  | itamo real                       |                      | le                              | jex, top application in drops                                                                                                                                                      | skin ulcera, earache             | •  |
| <i>Persea americana</i> Mill. (8457)                         | Lauraceae      | aguacate                         | zaboká               | le, collected dry from the soil | dec with salt, ing; mix 6                                                                                                                                                          | <i>empacho</i> ; mix 6           | •• |
|                                                              |                |                                  |                      | le                              | dec, drank as water                                                                                                                                                                | arthritis, rheumatic pains       | •  |
|                                                              |                |                                  |                      | se                              | grated, dec, applied as shampoo                                                                                                                                                    | lice                             | •  |
| <i>Petiveria alliacea</i> L. (8248)                          | Phytolaccaceae | anamú                            | malpughí, mal pourri | le                              | dec, ing                                                                                                                                                                           | colds, catarrh, kidney infection | •  |
|                                                              |                |                                  |                      |                                 | mix 5                                                                                                                                                                              | mix 5                            |    |
| <i>Phoradendron quadrangulare</i> (H.B.K) Kr. et Urb. (8355) | Loranthaceae   | palo caballero                   | uàuà                 | ro                              | mac in rum, ing                                                                                                                                                                    | aphrodisiac                      | •  |
| <i>Phyla scaberrima</i> (Juss. ex Pers.) Moldenke (8474)     | Verbenaceae    | oro azul                         |                      | le                              | dec, ing                                                                                                                                                                           | fever, ovaries pains             | •  |

|                                                   |                |                 |                   |    |                                                                   |                                                    |     |
|---------------------------------------------------|----------------|-----------------|-------------------|----|-------------------------------------------------------------------|----------------------------------------------------|-----|
| <i>Phyllanthus procerus</i> Wr. ex Sauv. (8288)   | Euphorbiaceae  |                 | deedó             | ap | dec, three times per day before fever raises, ing                 | fever, malaria                                     | ••  |
|                                                   |                |                 |                   |    | mix 2                                                             | mix 2                                              |     |
| <i>Pimenta dioica</i> (L.) Merr. (8289)           | Myrtaceae      | pimienta dulce  | pwa dus, pimá duz | le | inf, ing                                                          | stomach problems, colds                            | ••• |
|                                                   |                |                 |                   |    | mix 14                                                            | mix 14                                             |     |
| <i>Piper aduncum</i> L. (8247)                    | Piperaceae     | platanillo      | fey lesan         | le | dec, ing                                                          | catarrh                                            | •   |
|                                                   |                |                 |                   |    | heated and applied top on the forehead for one hour               | headache                                           | •   |
|                                                   |                |                 |                   |    | mix 3                                                             | mix 3                                              |     |
| <i>Piper auritum</i> Kunth (8436)                 | Piperaceae     | anisón          |                   | le | heated on the fire and then applied top on the stomach            | to expell intestinal gases                         | •   |
| <i>Plantago major</i> L. (8478)                   | Plantaginaceae | llantén         | plantén           | le | dec, ing                                                          | fever, kidney problems, ovaries pains              | •   |
|                                                   |                |                 |                   |    | jex, top application in drops                                     | earache, ear infections                            | •   |
| <i>Pluchea carolinensis</i> (Jacq.) G. Don (8282) | Asteraceae     | salvia de playa | tabak mau         | le | dec, ing                                                          | catarrh, headache                                  | •   |
|                                                   |                |                 |                   |    | dried and rolled, smoked                                          | respiratory problems ( <i>frialdad</i> ), headache | •   |
|                                                   |                |                 |                   |    | dec, bath                                                         | measle                                             | •   |
|                                                   |                |                 |                   |    | mix 1                                                             | mix 1                                              |     |
| <i>Portulaca oleracea</i> L.                      | Portulacaceae  | verdolaga       | kupyé             | le | dec or inf, ing                                                   | <i>empacho</i>                                     | •   |
|                                                   |                |                 |                   |    | boiled and eaten                                                  | intestinal parasites                               | ••• |
| <i>Priva lappulacea</i> (L.) Pers. (8599)         | Verbenaceae    |                 | usevá, kusevá     | sh | dec, ing                                                          | stomachic, carminative                             | ••  |
| <i>Protium cubense</i> (Rose) Urb. (8130)         | Burseraceae    | copal           | kopál             | le | inhalations, vapours (in the night, without going out afterwards) | catarrh, fever                                     | •   |
|                                                   |                |                 |                   |    | mix 4                                                             | mix 4                                              |     |

|                                                        |               |                     |                    |             |                                                                     |                                                                                      |     |
|--------------------------------------------------------|---------------|---------------------|--------------------|-------------|---------------------------------------------------------------------|--------------------------------------------------------------------------------------|-----|
| <i>Pseudelephantopus spicatus</i> (Juss.) Rohr. (8601) | Asteraceae    | lengua de vaca      | lambef (lang vach) | le          | rubbed on the skin, top                                             | itching, insect bites                                                                | •   |
|                                                        |               |                     |                    |             | dec with salt, ing                                                  | <i>empacho</i> , fever                                                               | •   |
| <i>Psidium guajava</i> L.                              | Myrtaceae     | guayaba             | guayav             | sh          | dec, three shoots with salt, ing                                    | diarrhea, stomach problems, stomach pains                                            | ••  |
|                                                        |               |                     |                    | le          | dec, left to cool, baths for children                               | to clean the skin and treat skin infections                                          | ••  |
|                                                        |               |                     |                    | young fruit | ing                                                                 | intestinal parasites                                                                 | ••• |
|                                                        |               |                     |                    | sh          | mix 8                                                               | mix 8                                                                                |     |
| <i>Rheedia aristata</i> Griseb. (8273)                 | Clusiaceae    | manajú              |                    | le          | dec, ing                                                            | asthma, catarrh                                                                      | •   |
|                                                        |               |                     |                    | re          | top appl                                                            | to take out spines                                                                   | •   |
|                                                        |               |                     |                    | ba          | mix 9                                                               | mix 9                                                                                |     |
| <i>Ricinus communis</i> L.                             | Euphorbiaceae | higuereta           | masketí            | se          | oil, ing                                                            | laxative, clean the interior, <i>empacho</i>                                         | •   |
|                                                        |               |                     |                    | le          | dec, vaginal steam bath by sitting above the pot with the decoction | problems of uterus, ovaries pains                                                    | •   |
|                                                        |               |                     |                    |             | one leaf is tied to the forehead for one night                      | headache ('the leaf absorbs the headache while getting dry')                         | •   |
| <i>Senna alata</i> (L.) Roxb. (8275)                   | Fabaceae      | palo santo          |                    | le          | dec or jex, bath                                                    | to clean (both ritually and skin cleaning), and to take away bad influence           | •   |
| <i>Senna obtusifolia</i> (L.) Roxb.                    | Fabaceae      | guanina, platanillo | pwa pian           | se          | dec, toasted and milled, as substitute of coffee, ing               | good for blood, headache, stomach pains, anemia, in the morning fasting for diabetes | ••  |
|                                                        |               |                     |                    | ro          | grated in a spoon of breast milk, ing                               | colics of infants                                                                    | •   |

|                                                    |               |                     |           |        |                                                                                      |                                                           |     |
|----------------------------------------------------|---------------|---------------------|-----------|--------|--------------------------------------------------------------------------------------|-----------------------------------------------------------|-----|
| <i>Solanum americanum</i> Mill. (5174)             | Solanaceae    | yerba mora          | lamá      | le     | trituated, juice applied topically                                                   | skin ulceras                                              | •   |
|                                                    |               |                     |           |        | chewed                                                                               | aperitive, stomach ulcera                                 | ••  |
|                                                    |               |                     |           |        | juice mixed with honey, mouth washes                                                 | mouth infections and inflammations                        | •   |
| <i>Solanum erianthum</i> D. Don. (8628)            | Solanaceae    | pendejera           | zamoghét  | le     | tr, jex, top application in the eyes                                                 | blurred vision                                            | •   |
|                                                    |               |                     |           |        | jex, ing                                                                             | stomach problems, good for kidneys                        | •   |
| <i>Solanum melongena</i> L.                        | Solanaceae    | berenjena           | berenjen  | sh, fl | three shoots and three flowers, dec, ing                                             | stomach pains                                             | •   |
| <i>Stachytarpheta jamaicensis</i> (L.) Vahl (8249) | Verbenaceae   | verbena             | vevén     | le     | three leaves, dec, drunk as decoction or as common water at fast in the morning      | intestinal parasites, to clean the blood                  | ••  |
|                                                    |               |                     |           |        | dec, or leaves put directly in the water of the bath, baths for children and infants | refreshing, to clean the skin, for carbuncles and eczemas | ••• |
|                                                    |               |                     |           |        | dec, ing                                                                             | catarrh, to help dentition                                | •   |
| <i>Tamarindus indica</i> L.                        | Fabaceae      | tamarindo           | tomagué   | le     | dec, ing                                                                             | high pressure                                             | •   |
|                                                    |               |                     |           | fr     | chewed                                                                               | high pressure                                             | •   |
| <i>Terminalia catappa</i> L. (7003)                | Combretaceae  | almendra            | zamánd    | le     | dec, ing; mix 3                                                                      | fever, catarrh; mix 3                                     | •   |
| <i>Thevetia peruviana</i> (Pers.) K. Schum. (2820) | Apocynaceae   | cabalonga           | fey sezi  | se     | kept in the pocket                                                                   | high pressure                                             | •   |
| <i>Tradescantia discolor</i> L'Hér. (7833)         | Commelinaceae | cordoban            |           | le     | dec of two leaves with sugar, ing at fast in the morning                             | tonic                                                     | •   |
| <i>Tradescantia spathacea</i> Sw. (8614)           | Commelinaceae | barquillo, cordobán | sangloriá | le     | heated and applied on the forehead                                                   | headache                                                  | •   |

|                                                                                                                                                                                                                                                                                                                                     |               |                     |                 |        |                                         |                                       |    |
|-------------------------------------------------------------------------------------------------------------------------------------------------------------------------------------------------------------------------------------------------------------------------------------------------------------------------------------|---------------|---------------------|-----------------|--------|-----------------------------------------|---------------------------------------|----|
| <i>Trichilia glabra</i> L. (8233)                                                                                                                                                                                                                                                                                                   | Meliaceae     | siguaraya           |                 | le     | dec, bath                               | to clean and take away bad influences | ●● |
| <i>Turnera ulmifolia</i> L. (8252)                                                                                                                                                                                                                                                                                                  | Turneraceae   | marilope            |                 | le     | dec, ing                                | diarrhea                              | ●  |
| <i>Urera baccifera</i> (L.) Gaud. (8300)                                                                                                                                                                                                                                                                                            | Urticaceae    | chichicate          |                 | le     | dec, ing                                | diuretic, good for kidneys            | ●  |
| <i>Vitex trifolia</i> L. (8308)                                                                                                                                                                                                                                                                                                     | Verbenaceae   | yo puedo mas que tu | kapapaseó       | st, le | dec or jex, bath                        | to clean and take away bad influences | ●  |
| <i>Xanthosoma sagittifolium</i> (L.) Schott                                                                                                                                                                                                                                                                                         | Araceae       | malanga             | malangá, kalaib | tu     | cooked without salt and eaten with milk | stomach ulcera                        | ●● |
| <i>Zingiber officinale</i> Rosc. (8298)                                                                                                                                                                                                                                                                                             | Zingiberaceae | genjibre            | gengián         | rh     | dec, ing                                | colds, catarrh, rheumatic pains       | ●● |
|                                                                                                                                                                                                                                                                                                                                     |               |                     |                 |        | mix 10, 16                              | mix 10, 16                            |    |
| <sup>a</sup> Non-recorded names are missing from the table. Names within parenthesis are uncorrect names reported by informants, usually a translation of the Spanish name to Creole.                                                                                                                                               |               |                     |                 |        |                                         |                                       |    |
| <sup>b</sup> Part( s) used: ap, aerial part; ba, bark; bu, bulb; ep, fruit epicarp; fl, flowers; fr, fruits; ft, flowering tops; la, latex; le, leaves; ls, leaf stalks; re, resin; rh, rhizome; ro, root; se, seeds; sg, stigma; sh, shoots; st, stems; tu, tuber; uf, unripe fruits; wh, young whorls; wo, wood; wp, whole plant. |               |                     |                 |        |                                         |                                       |    |
| <sup>c</sup> Preparation: dec, decoction; fr, frying; inf, infusion; jex, juice extraction; mac, maceration; tr, trituration.                                                                                                                                                                                                       |               |                     |                 |        |                                         |                                       |    |
| <sup>d</sup> Way of use: ing, ingestion; top, topical application                                                                                                                                                                                                                                                                   |               |                     |                 |        |                                         |                                       |    |
| <sup>e</sup> Quotation frequency: ●: quoted by less than 10% of the informants; ●●: quoted by more than 10% and less than 40% of the informants; ●●●: quoted by more than 40% of the informants.                                                                                                                                    |               |                     |                 |        |                                         |                                       |    |
